# Supplementary material for: Polymer coil–globule phase transition is a universal folding principle of Drosophila epigenetic domains
Source: PubMed Central journal article supplement (PMC6515630; doi:10.1186/s13072-019-0269-6), 2019-05-13

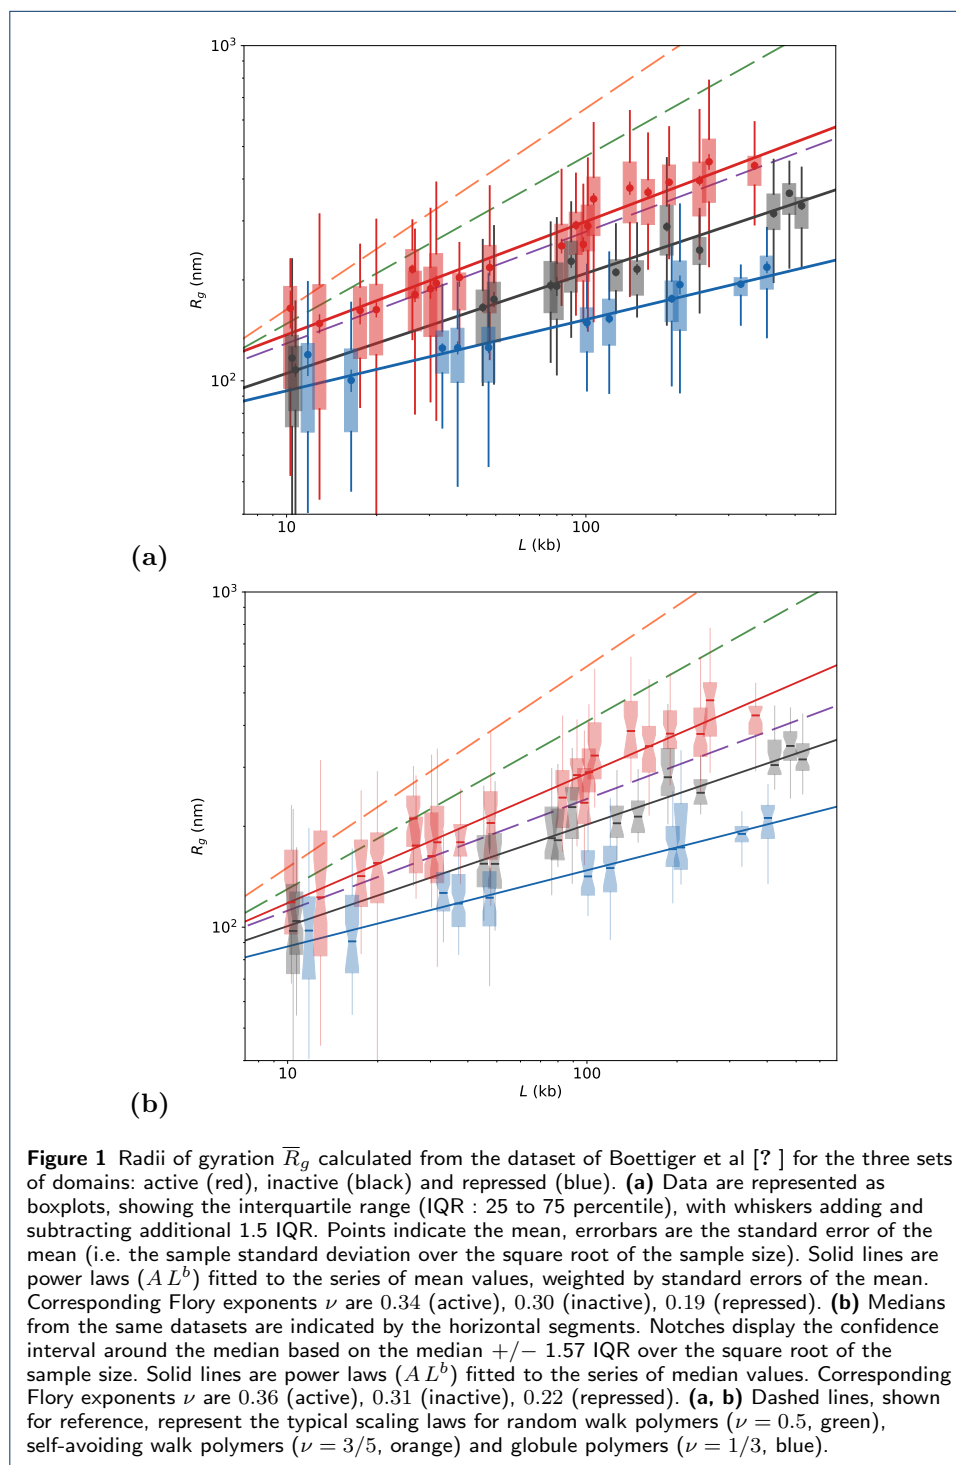

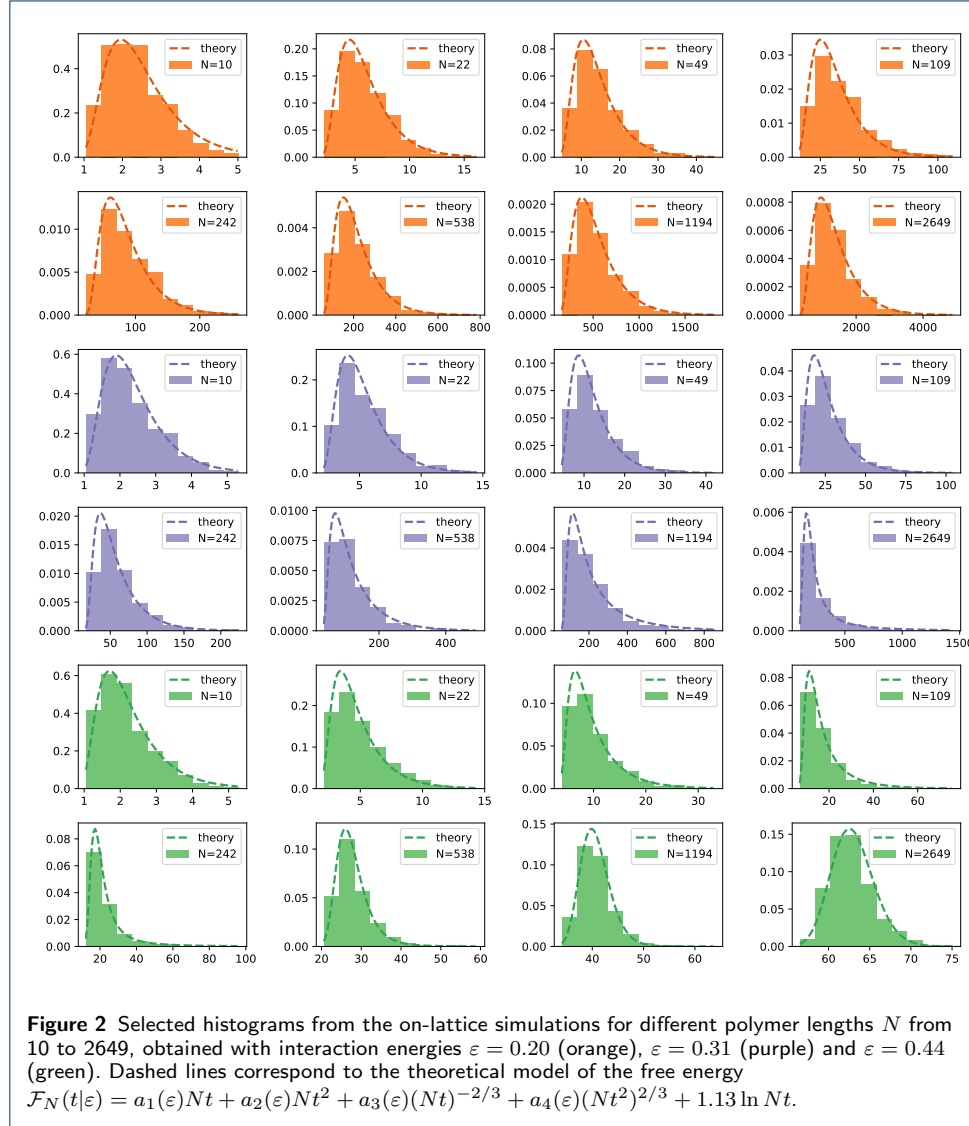

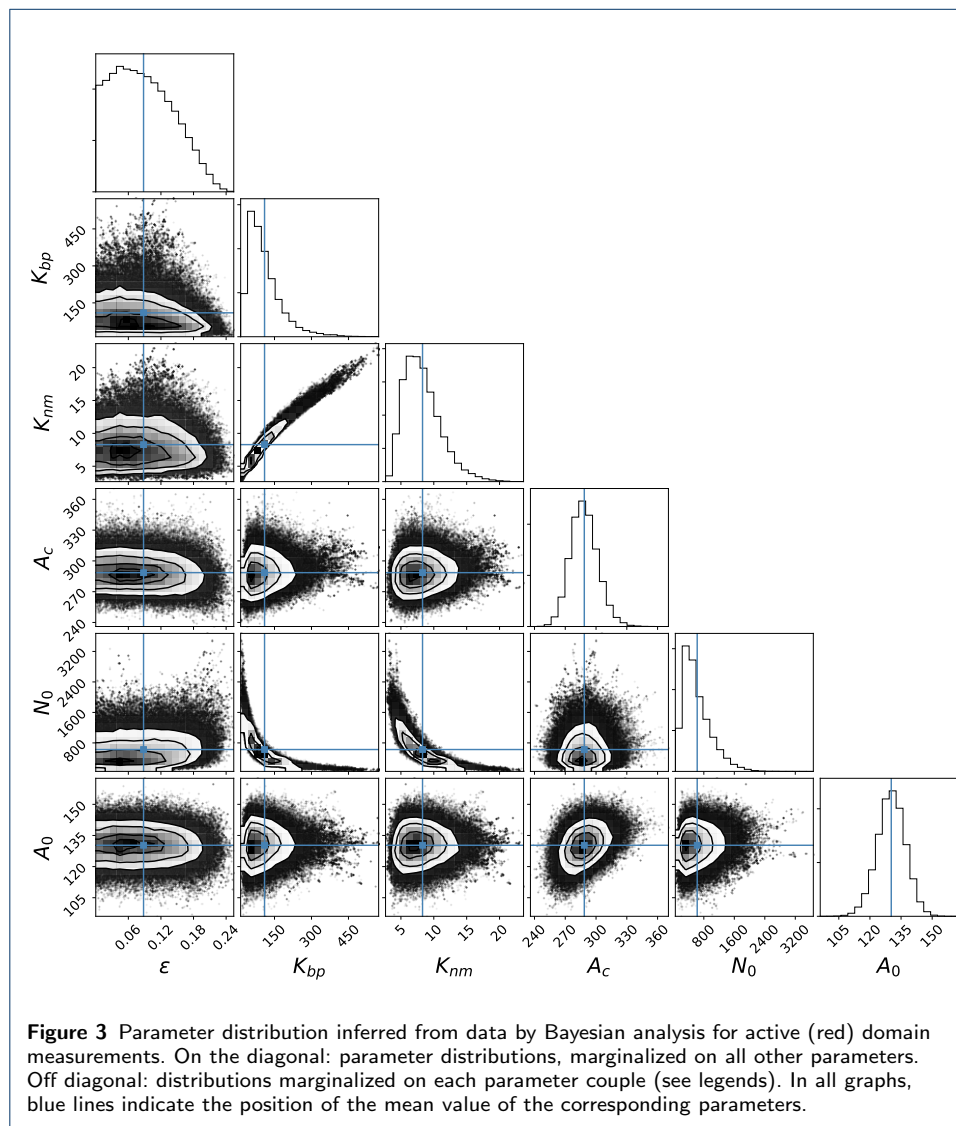

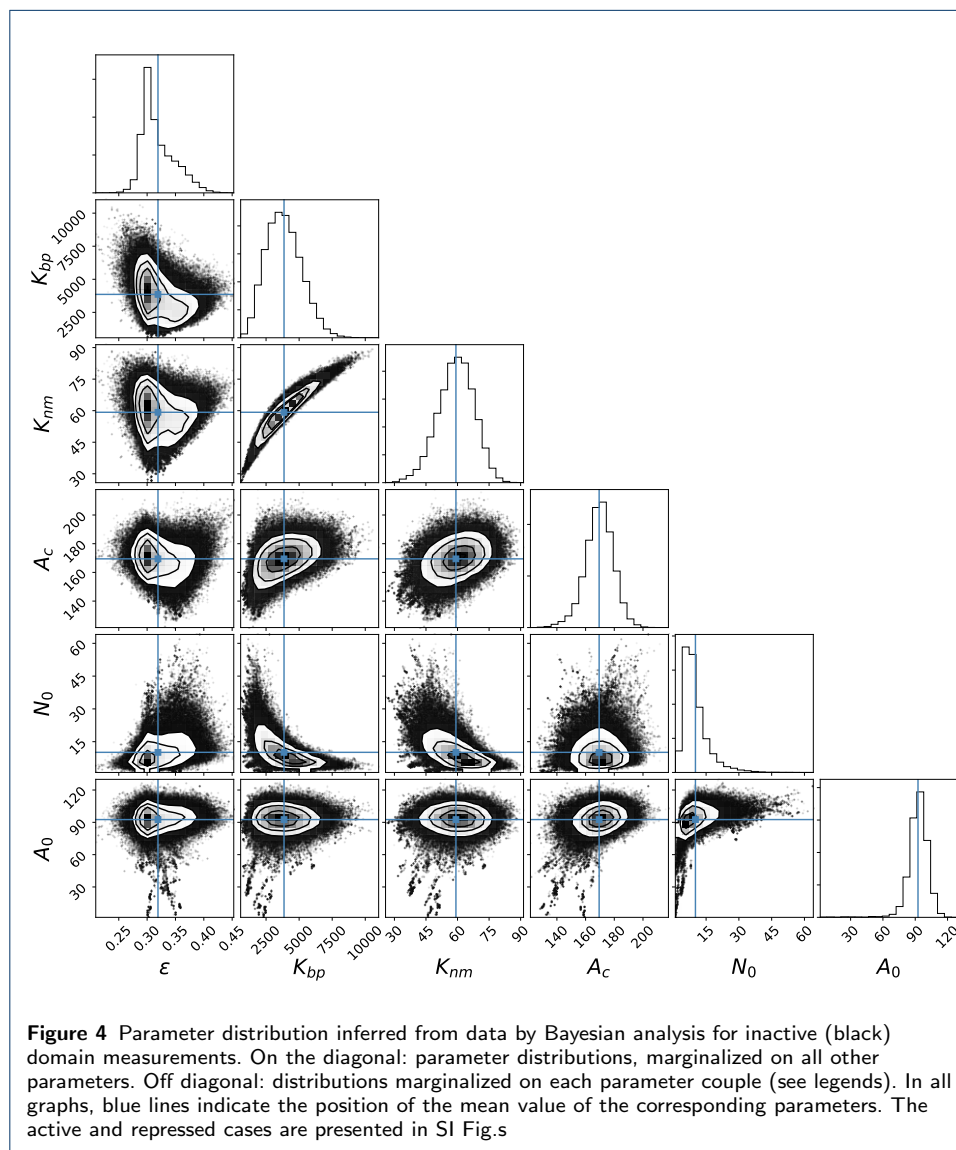

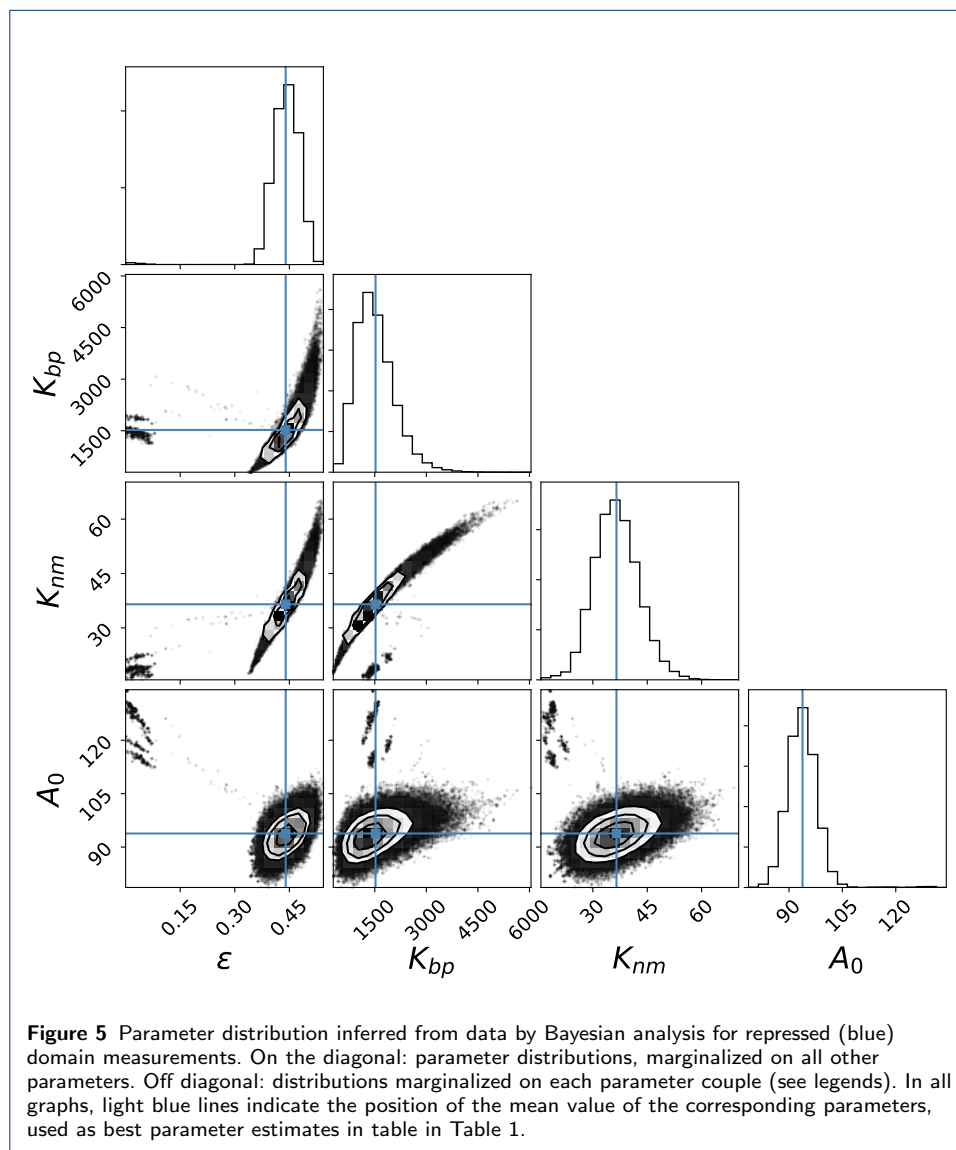

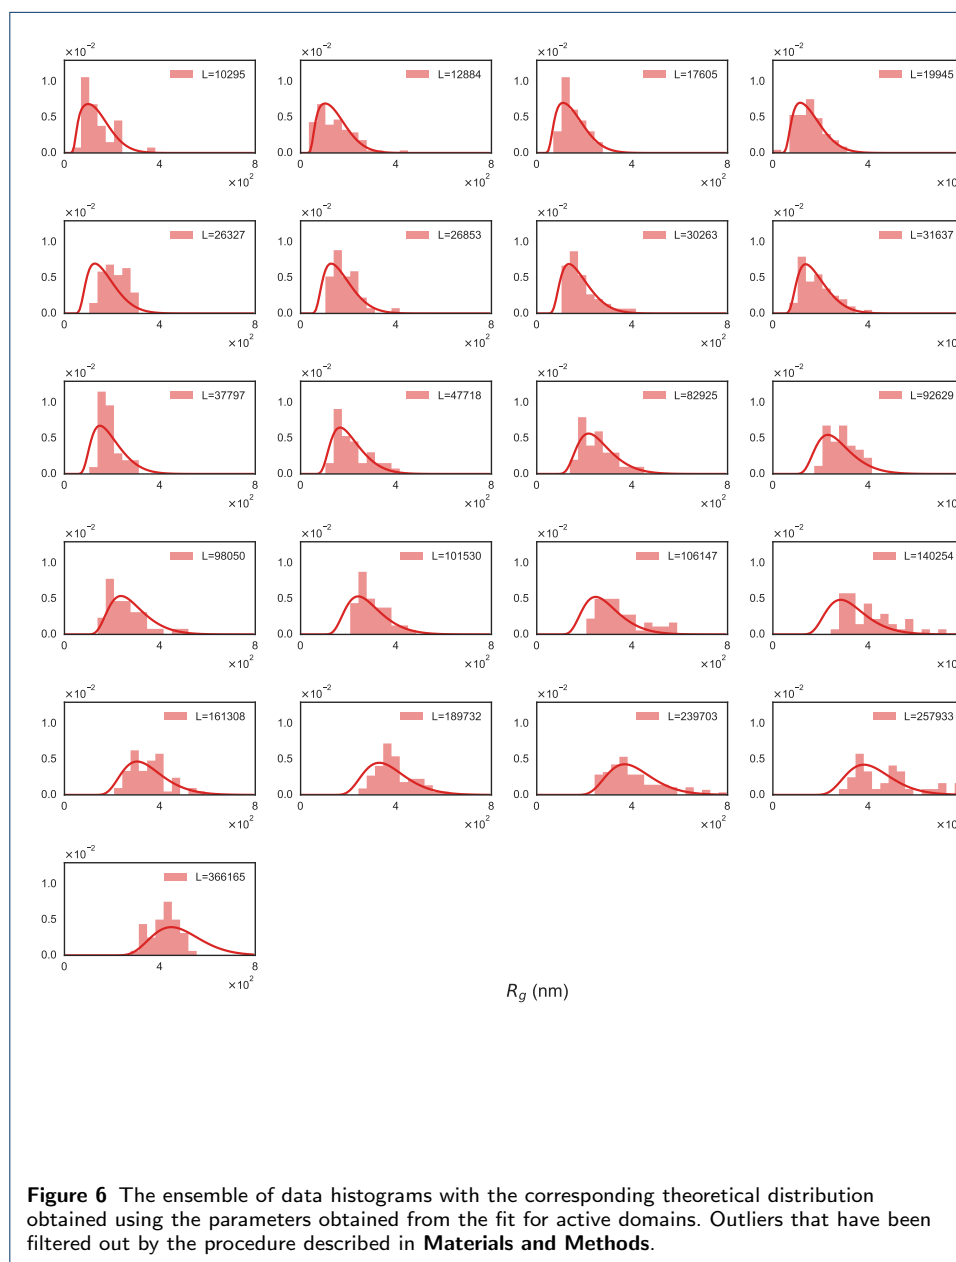

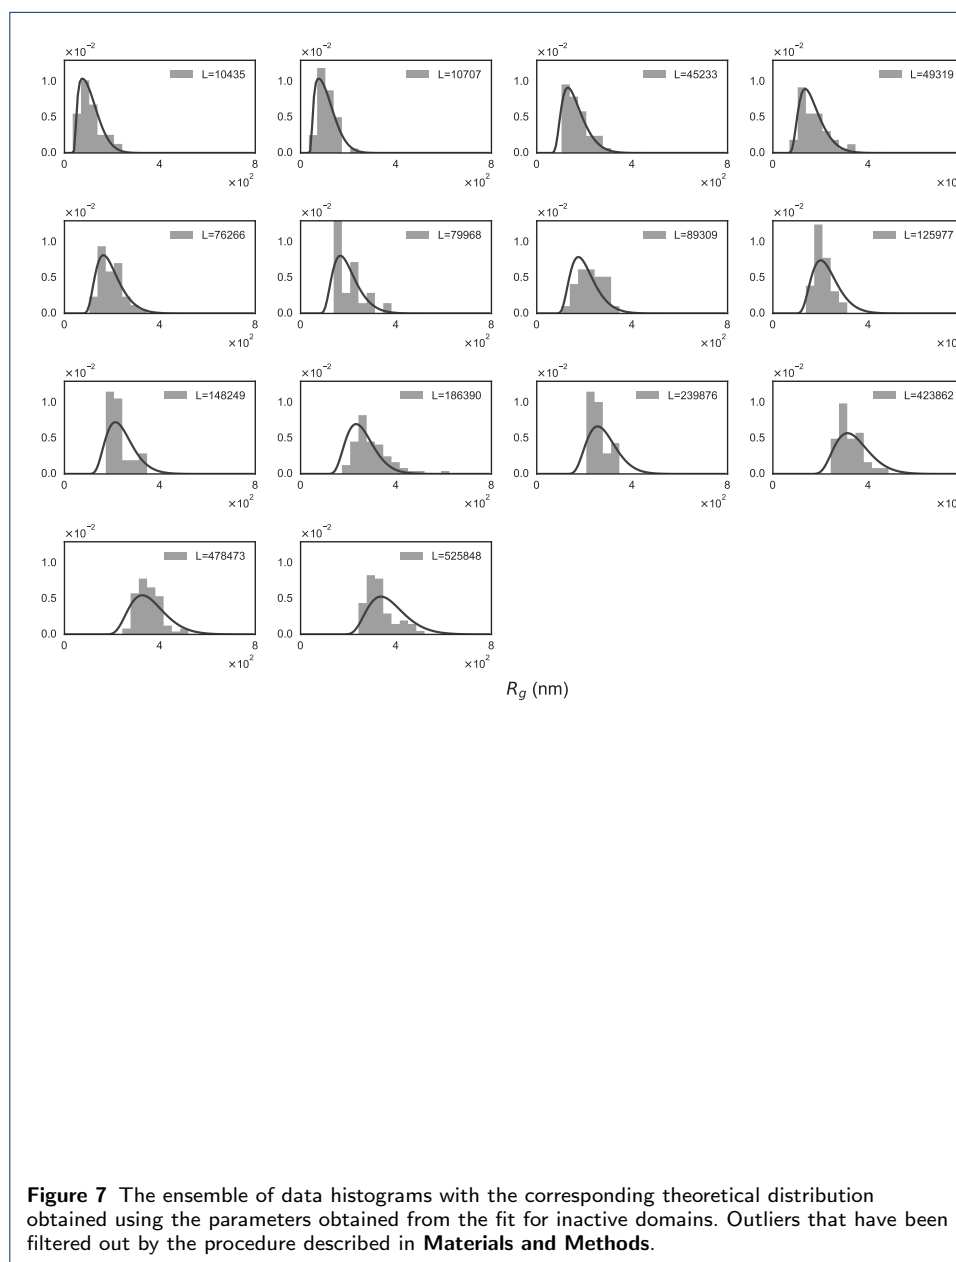

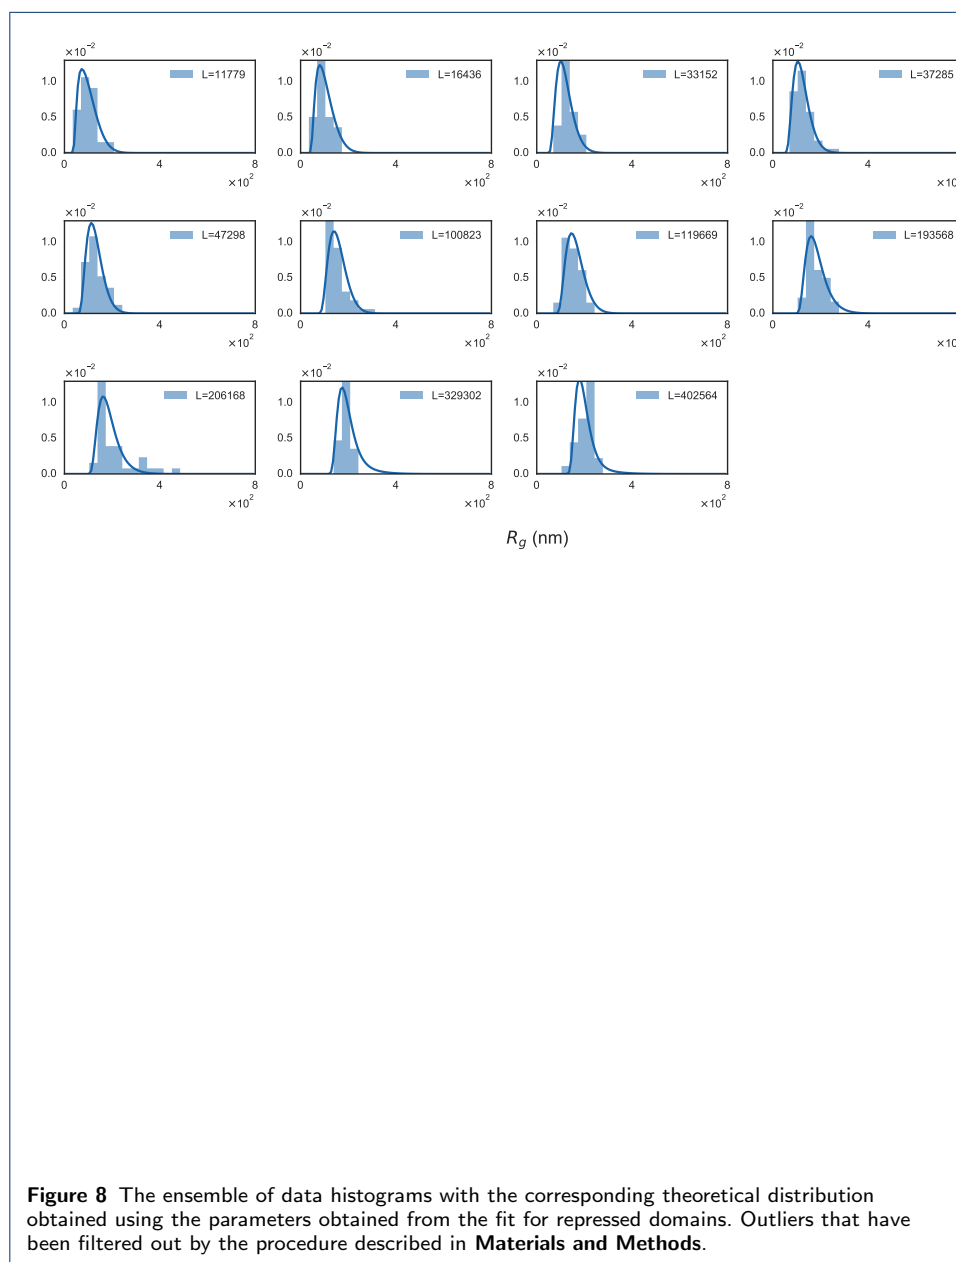



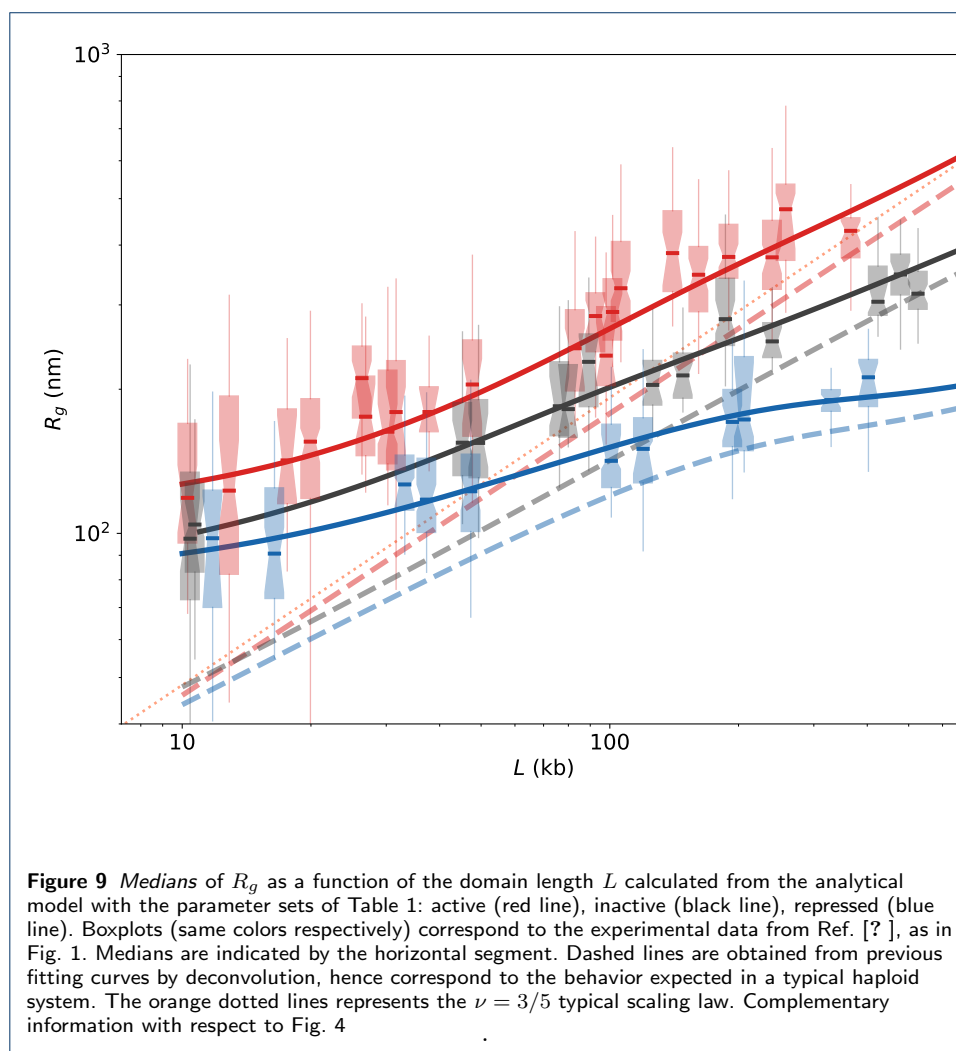

Supplement: 13072_2019_269_MOESM1_ESM.pdf [file 13072_2019_269_MOESM1_ESM.pdf]
